# Supplementary material
Source: MDPI journal article supplement (https://www.mdpi.com/2071-1050/15/17/12718)
Supplement: s1 [file s1]

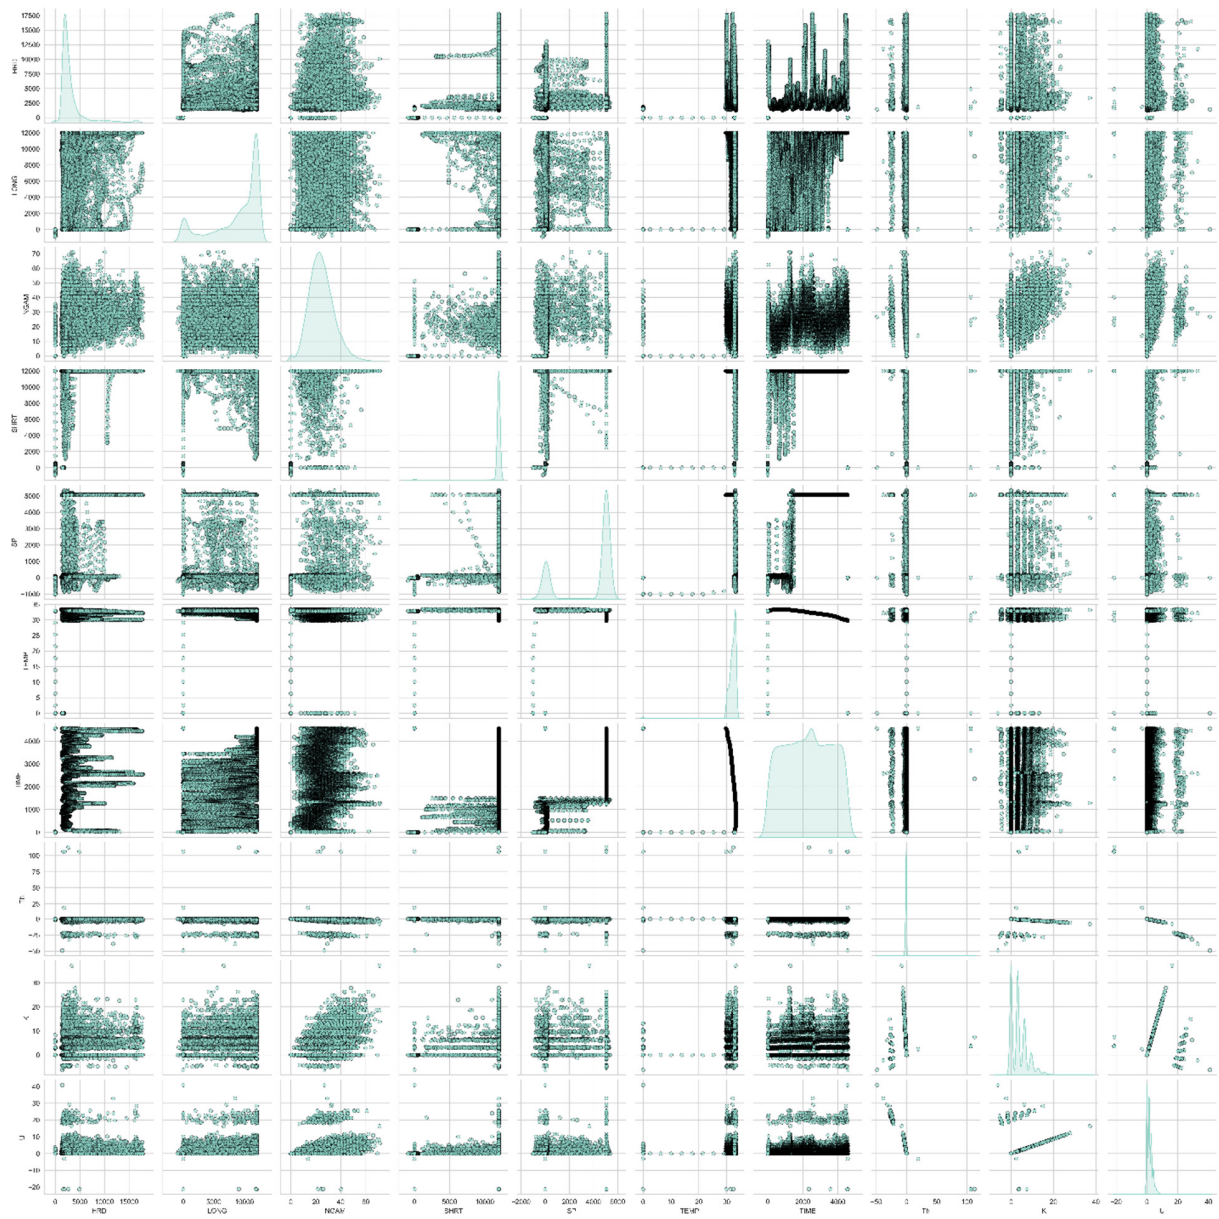

Figure S1. Pair plot without removal of the outlier of RAH-13 well.

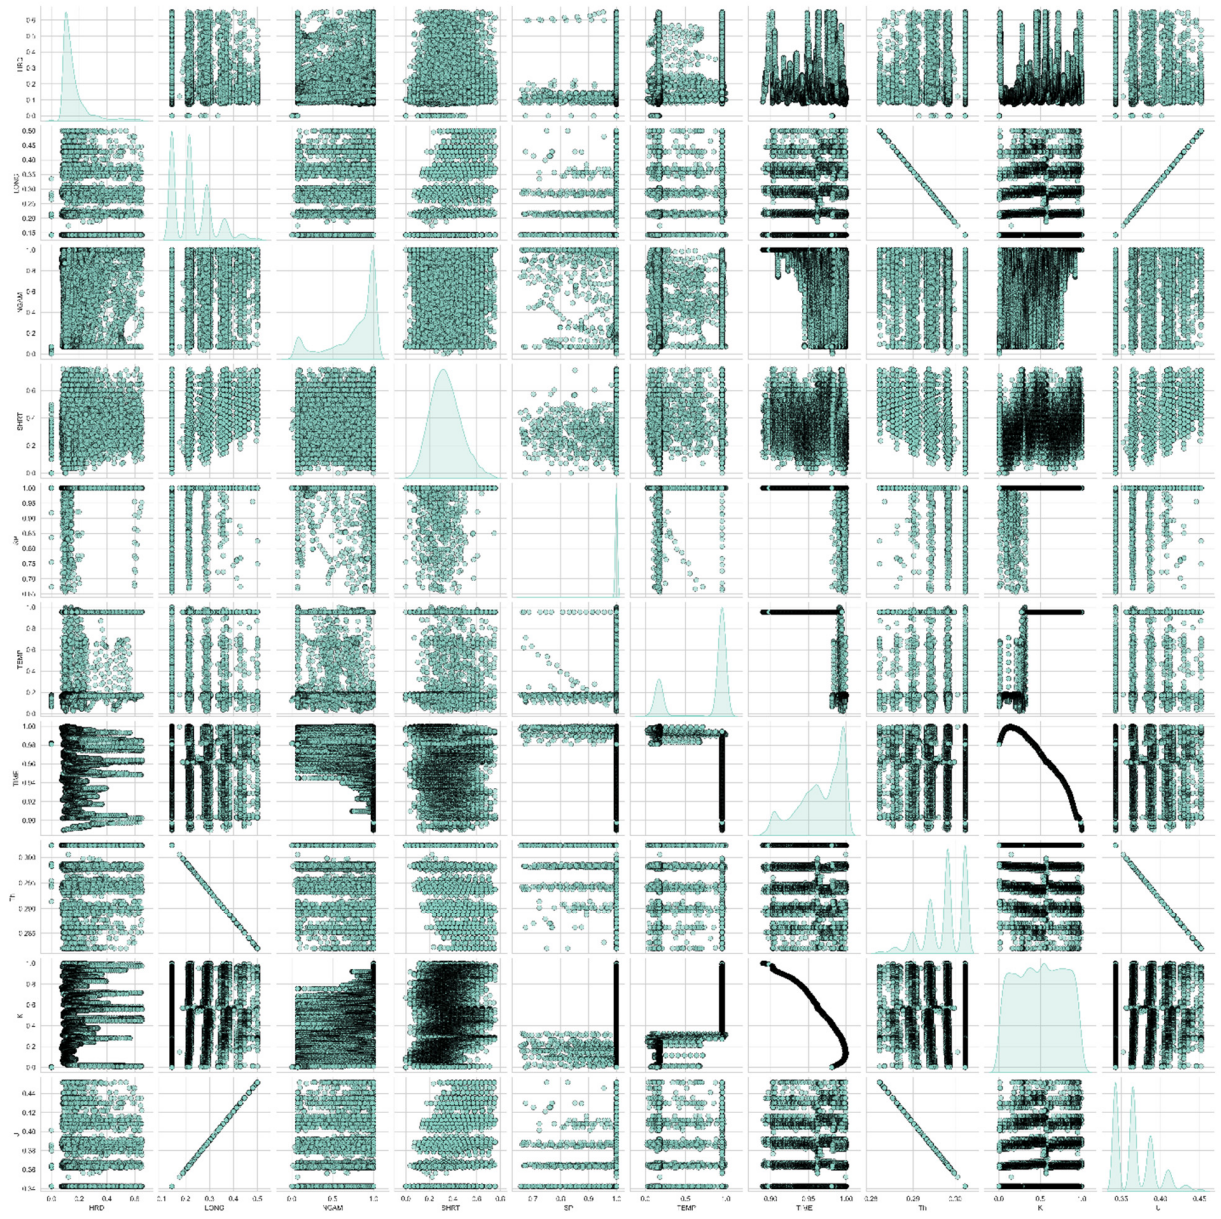

Figure S2. Pair plot after removal of the outlier of RAH-13 Well.
